# Supplementary material for: Construction of titanium dioxide nanorod/graphite microfiber hybrid electrodes for a high performance electrochemical glucose biosensor
Source: Royal Society of Chemistry journal article supplement (doi:10.1039/c6nr01360k), 2016-01-01
Supplement: c6nr01360k1.pdf [file c6nr01360k1.pdf]

## Supporting Information

### **Construction of titanium dioxide nanorod/graphite microfiber hybrid electrodes for high performance electrochemical glucose biosensor**

Jian Zhang,<sup>a,1,2</sup> Xin Yu,<sup>a,1,2</sup> Weibo Guo,<sup>1,2</sup> Jichuan Qiu,<sup>1,2</sup> Xiaoning Mou,<sup>1</sup> Aixue Li,<sup>\*3</sup> Hong Liu<sup>\*1,2</sup>

1 1 Beijing Institute of Nanoenergy and Nanosystems, Chinese Academy of Sciences; National Center for Nanoscience and Technology (NCNST), Beijing, 100083, P. R. China.

2 State Key Laboratory of Crystal Materials, Shandong University, Jinan 250100, P. R. China.

3 National Research Center of Intelligent Equipment for Agriculture, Beijing Academy of Agriculture and Forestry Sciences, Beijing, 100097, China.

a These authors contributed equally to this work.

E-mail: hongliu@sdu.edu.cn, lax200178@aliyun.com

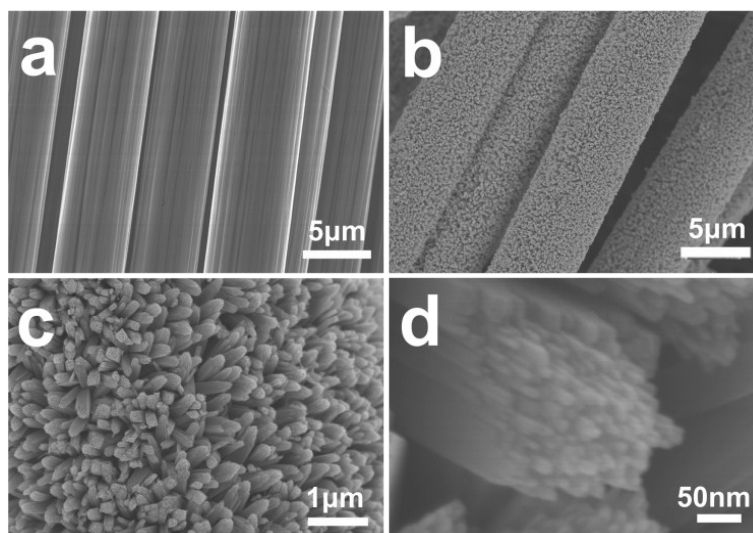

**Figure S1.** SEM images of graphite microfiber (a), TiO<sub>2</sub> nanorod/graphite microfiber (b) and high resolution images of TiO<sub>2</sub> nanorods on surface of graphite microfiber (c and d).

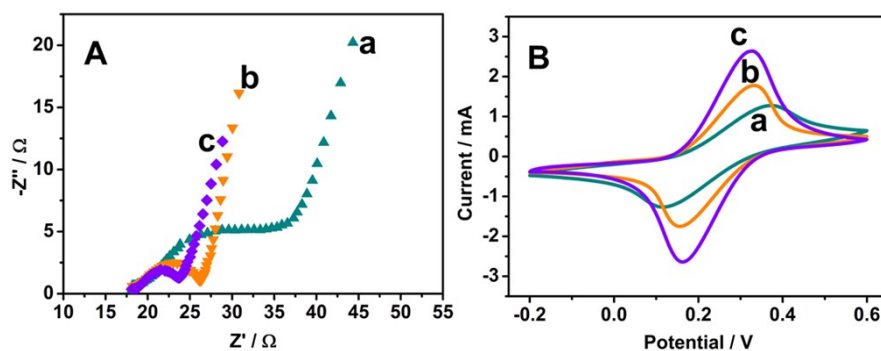

**Figure S2.** (A) Nyquist plot of GOx/chitosan/TiO<sub>2</sub> nanorod/graphite microfiber electrode (a), chitosan/TiO<sub>2</sub> nanorods/graphite microfiber electrode (b) and TiO<sub>2</sub> nanorod/graphite microfiber electrode(c); (B) CV of GOx/chitosan/TiO<sub>2</sub> nanorod/graphite microfiber electrode (a), chitosan/TiO<sub>2</sub> nanorod/graphite microfiber electrode (b) and TiO<sub>2</sub> nanorod/graphite microfiber electrode(c). (A) and (B) were both recorded in 0.01 M PBS containing 5mM K<sub>3</sub>[Fe(CN)<sub>6</sub>]/K<sub>4</sub>[Fe(CN)<sub>6</sub>] and 0.1 M KCl (pH 7.4).

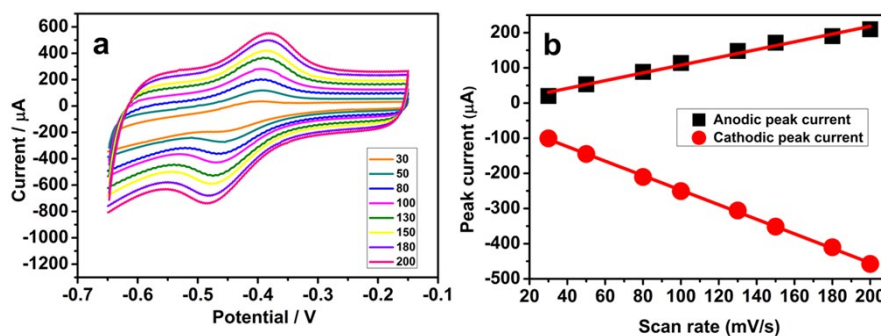

**Figure S3.** CV of GOx/chitosan/TiO<sub>2</sub> nanorod/graphite microfiber electrode in 0.1 M pH 7.0 N<sub>2</sub>-saturated PBS at different scan rate of 30, 50, 80, 100, 130, 150, 180, 200mV s<sup>-1</sup> (from inside to outside)(a); Plots of anodic and cathodic peak currents vs. scan rate(b).

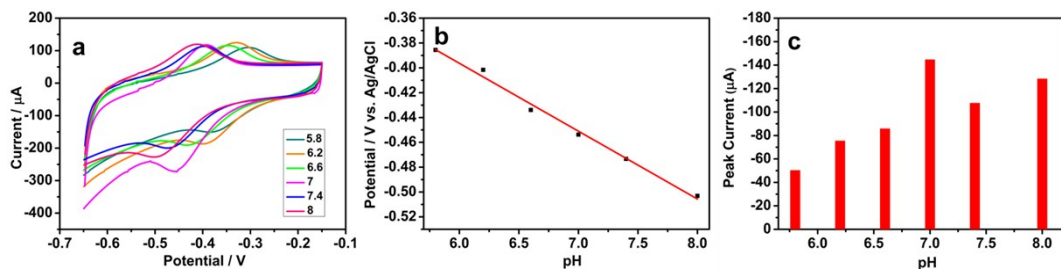

**Figure S4.** CV of GOx/chitosan/TiO<sub>2</sub> nanorod/graphite microfiber electrode in N<sub>2</sub>-saturated 0.1 M PBS with different pH values of 5.8, 6.2, 6.6, 7.0, 7.4 and 8.0 at a scan rate of 50 mV s<sup>-1</sup> (a); plot of formal potentials vs. pH (b); plot of peak currents vs. pH (c).

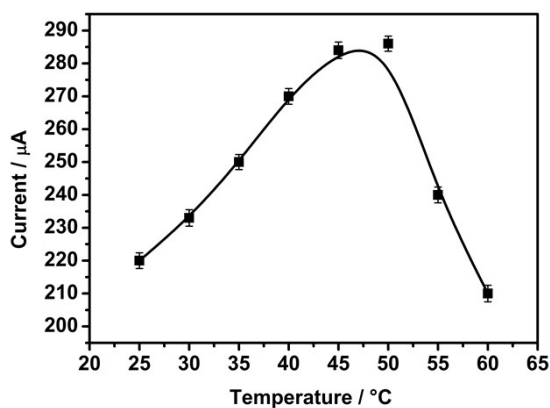

**Figure S5.** Plots of current response vs. temperature of GOx/chitosan/TiO<sub>2</sub> nanorod/graphite microfiber electrode in N<sub>2</sub>-saturated 0.1 M PBS.

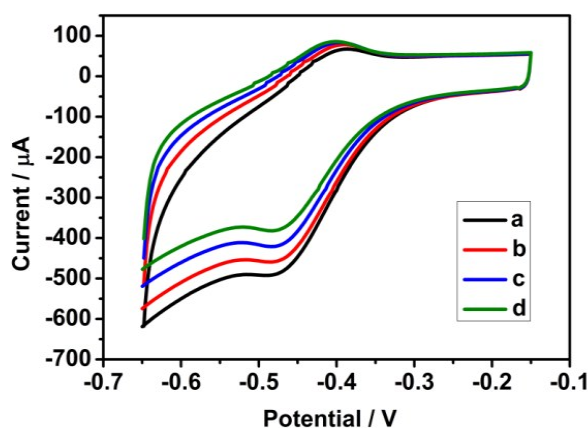

**Figure S6.** CV of GOx/chitosan/TiO<sub>2</sub> nanorod/graphite microfiber electrode in 0.1 M O<sub>2</sub>-saturated PBS (pH 7.0) including 0, 1.0, 3.0 and 5.0 mM glucose (a-d) at a scan rate of 50 mV s<sup>-1</sup>.

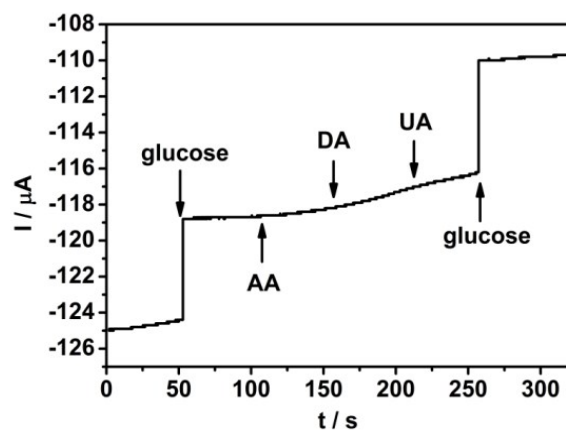

**Figure S7.** Amperometric response of GOx/chitosan/TiO<sub>2</sub> nanorod/graphite microfiber electrode to 0.5mM glucose, 0.5mM AA and 0.5mM UA in 0.5 M pH 7.0 PBS at -0.50 V applied potential.

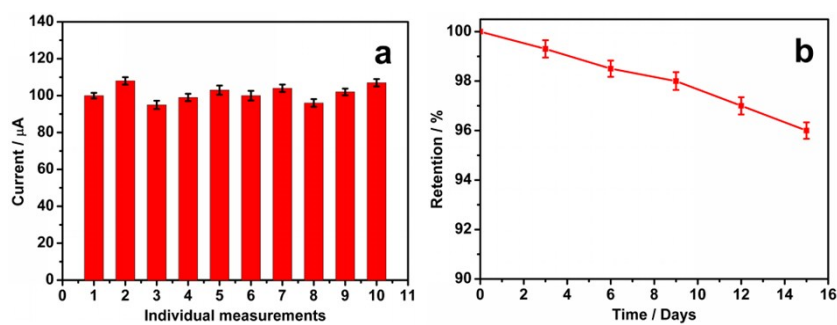

**Figure S8.** (a) Reproducibility and (b) stability of GOx/chitosan/TiO<sub>2</sub> nanorod/graphite microfiber electrode at a scan rate of 50 mV s<sup>-1</sup> from the response to 100 $\mu\text{M}$  glucose.

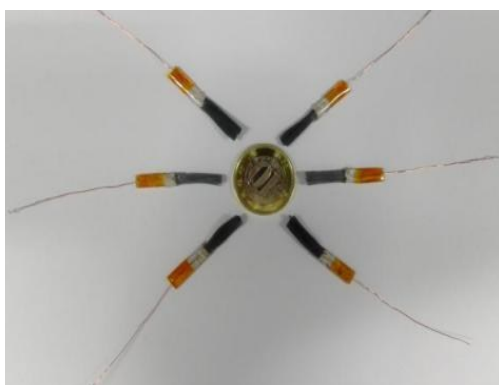

**Figure S9.** The optical photograph of the working electrodes.

| Electrode                                                     | Applied potential<br>(V) | Sensitivity<br>(mA M <sup>-1</sup> cm <sup>-2</sup> ) | Detection limit<br>(mM) | Ref       |
|---------------------------------------------------------------|--------------------------|-------------------------------------------------------|-------------------------|-----------|
| GOx/chitosan/TiO <sub>2</sub> nanorod/<br>graphite microfiber | -0.5                     | 18.6                                                  | 0.0022                  | This work |
| GOx/SnS <sub>2</sub> /Nafion/GCE                              | -0.45                    | 7.6                                                   | 0.01                    | 46        |
| GOx/CNx-MWNTs/GCE                                             | -0.5                     | 13                                                    | 0.01                    | 13        |
| GOx/Pt/FCNA/GCE                                               | -0.08                    | 6.0                                                   | 0.3                     | 47        |
| NPG/PEDOT/GOx                                                 | 0.2                      | 7.3                                                   | 0.01                    | 48        |
| GOx/NiO hollow spheres/GCE                                    | 0.35                     | 3.4                                                   | 0.047                   | 49        |
| MSCF/GOD/Nafion/GCE                                           | -0.4                     | 1.8                                                   | 0.035                   | 34        |

Table S1 Comparison of analytical performance between GOx/chitosan/TiO<sub>2</sub> nanorod/graphite microfiber and other modified electrodes.

| Samples | Referenced Values (mM) | Determined values (mM) | RSD (%) |
|---------|------------------------|------------------------|---------|
| 1       | 4.50                   | 4.59                   | 2.80    |
| 2       | 4.65                   | 4.71                   | 2.69    |

Table S2 Glucose detection in human serum using the GOx/chitosan/TiO<sub>2</sub> nanorod/graphite microfiber biosensor.
